# Supplementary material
Source: publisher figshare collection journal article supplement (https://karger.figshare.com/ndownloader/files/31547225)

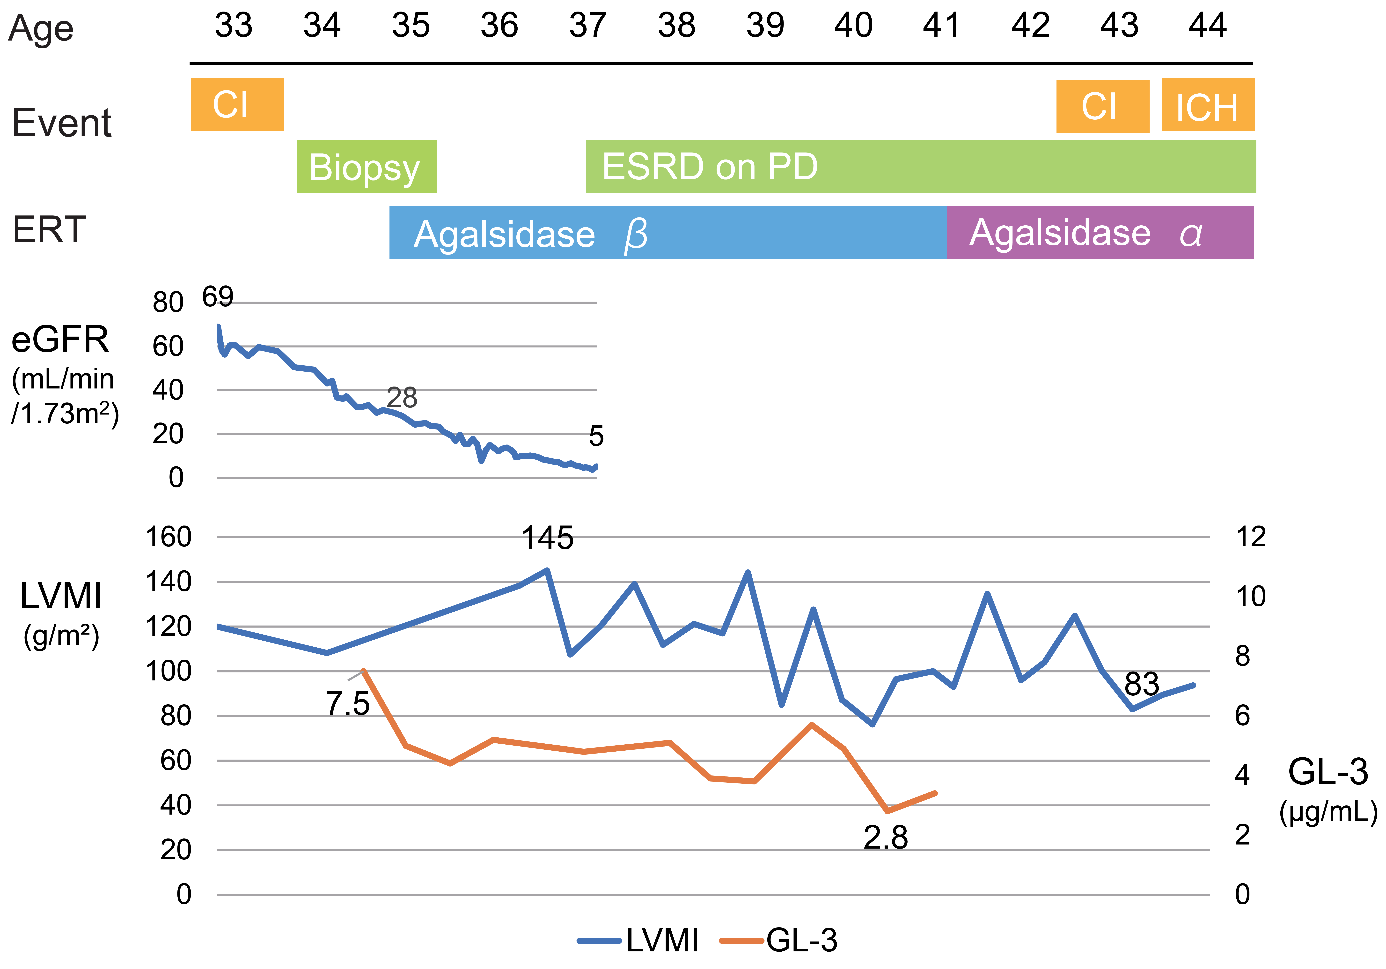

Supplement: Supplementary file 1 [file 31547225]
